# Supplementary material for: Na3V2(PO4)2F3@C dispersed within carbon nanotube frameworks as a high tap density cathode for high-performance sodium-ion batteries
Source: Royal Society of Chemistry journal article supplement (doi:10.1039/c8ta00990b), 2018-01-01
Supplement: c8ta00990b1.pdf [file c8ta00990b1.pdf]

## Supporting Information

### **Na<sub>3</sub>V<sub>2</sub>(PO<sub>4</sub>)<sub>2</sub>F<sub>3</sub>@C dispersed within carbon nanotube frameworks as high tap density cathode for high-performance sodium-ion batteries**

Chao Shen,<sup>a</sup> Hai Long,<sup>a</sup> Gencheng Wang,<sup>a</sup> Wei Lu,<sup>b</sup> Le Shao,<sup>\*c</sup> and Keyu Xie<sup>\*a</sup>

<sup>a</sup> *State Key Laboratory of Solidification Processing, Center for Nano Energy Materials, Northwestern Polytechnical University and Shaanxi Joint Laboratory of Graphene (NPU), Xi'an 710072, China.*

*Email: kyxie@nwpu.edu.cn*

<sup>b</sup> *University Research Facility in Materials Characterization and Device Fabrication, The Hong Kong Polytechnic University, Hong Kong, China.*

<sup>c</sup> *Shaanxi Coal and Chemical Technology Institute Co., Ltd, Jinye Road, Xi'an 710070, China.*

*Email: shaole@sxcti.com*

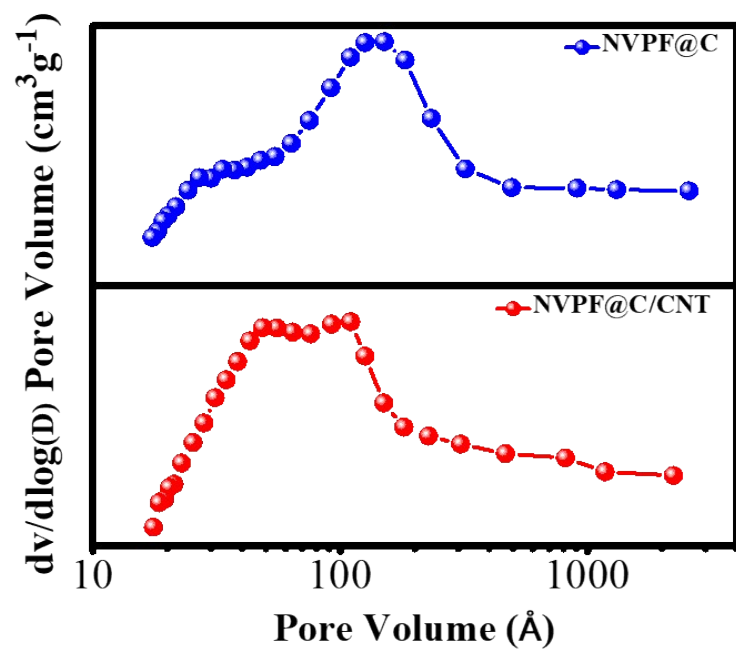

**Figure S1.** The plot of pore-size distribution of NVPF@C and NVPF@C/CNTs, respectively.

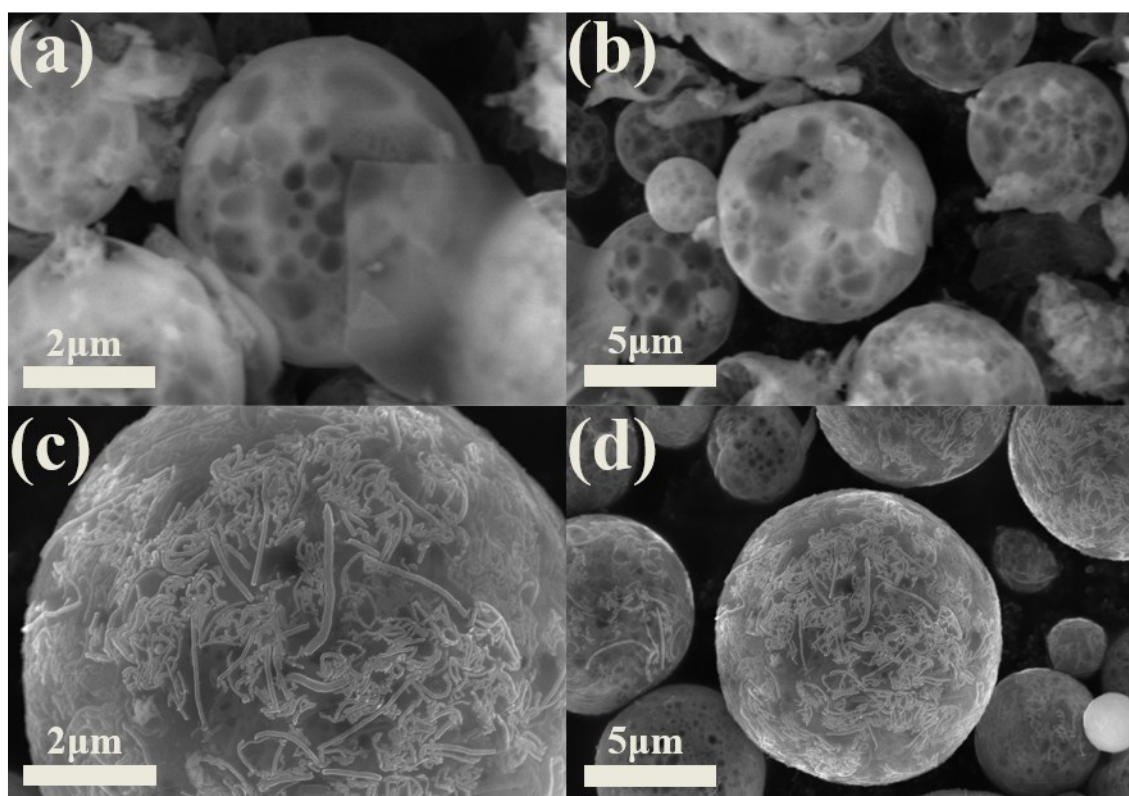

**Figure S2.** SEM images of the precursor (a, b) NVPF@C and (c, d) of NVPF@C/CNTs.

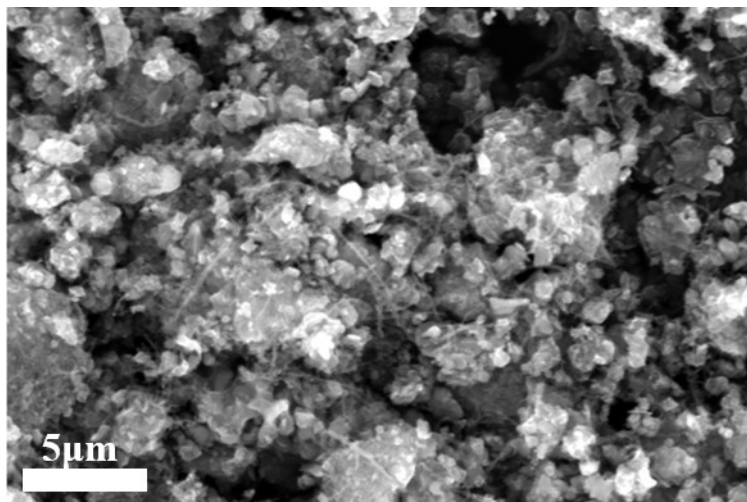

**Figure S3.** The SEM images of BM-NVPF@C/CNTs samples with an irregular shape of secondary particle and nano-sized of primary particle.

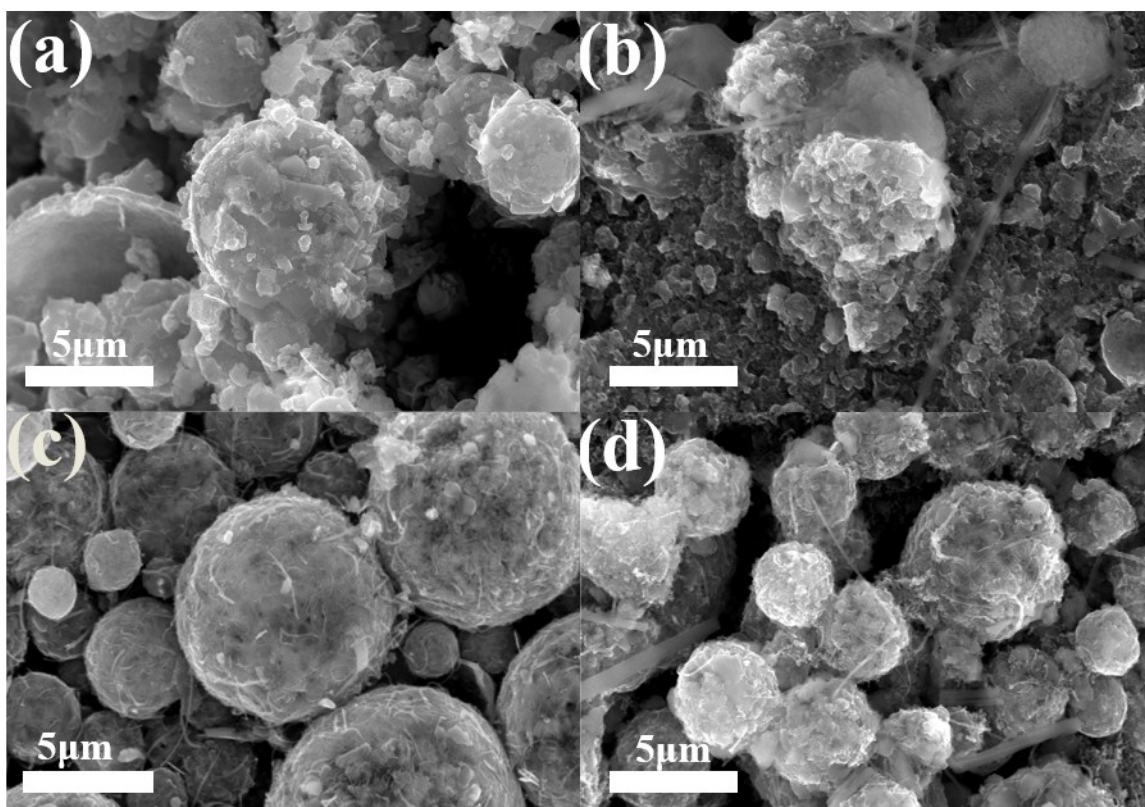

**Figure S4.** SEM images of (a) NVPF@C and (c) NVPF@C/CNT before cycle; SEM images of (b) NVPF@C and (d) NVPF@C/CNTs, after discharge and charge at 10 C for 300 cycles.

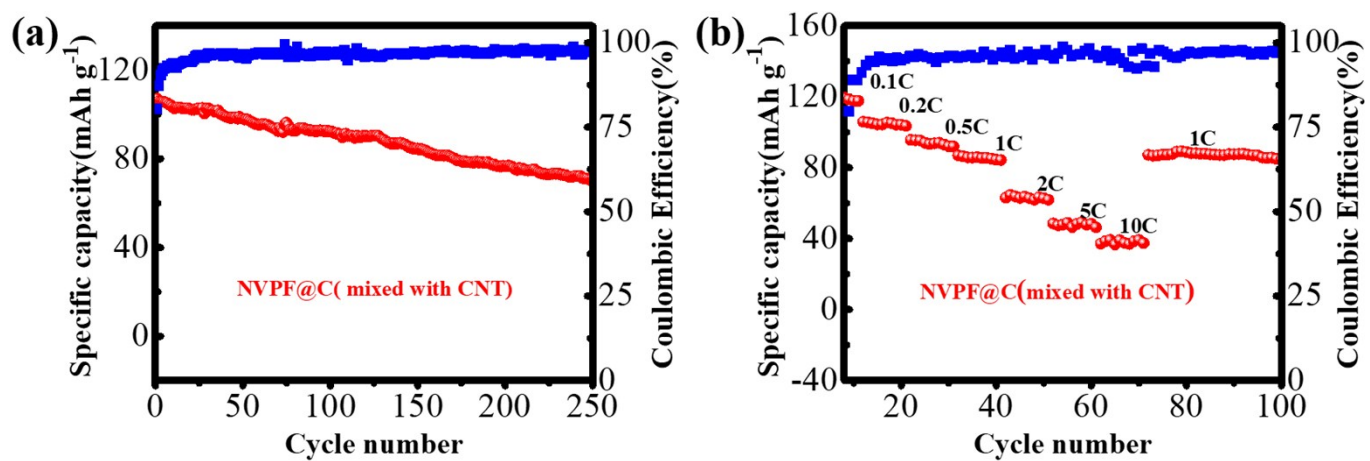

**Figure S5.** (a) Cycle performance and Coulombic efficiency of the physical mixture of NVPF@C and CNTs for 250 cycles; (b) Rate capability at various current rates for the physical mixture of NVPF@C and CNTs.

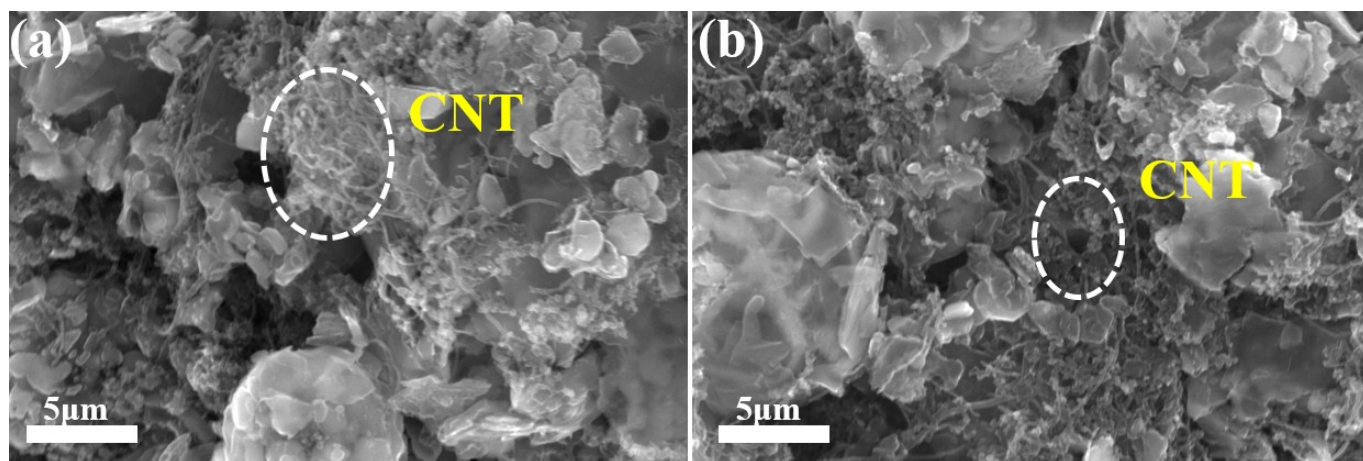

**Figure S6.** (a-b) SEM images of the physical mixture of NVPF@C and CNTs.

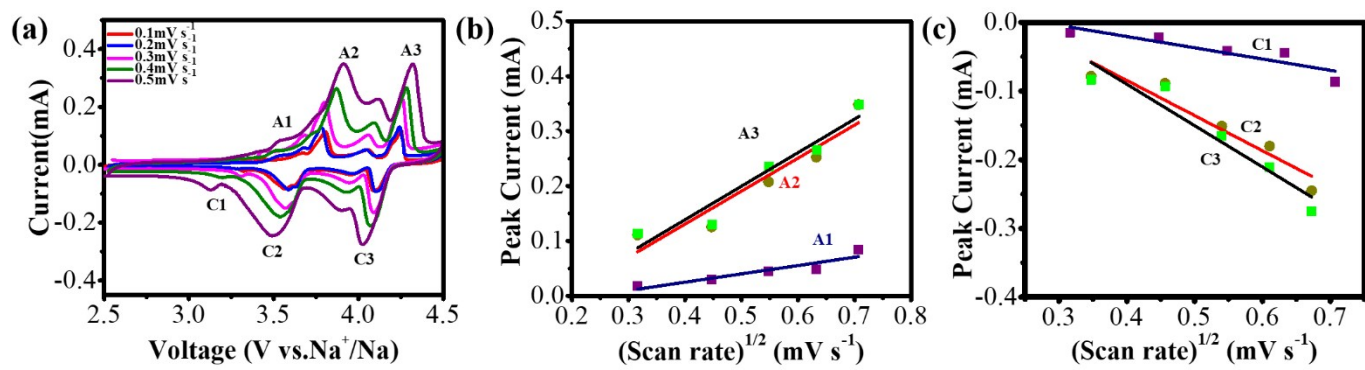

**Figure S7.** (a) CV curves at different scan rates of the NVPF@C; (b, c) show the relationship between the peak current ( $I_p$ ) and the square root of the scan rate ( $n^{1/2}$ ).
